# Supplementary material
Source: publisher site journal article supplement (https://www.degruyterbrill.com/publication/isbn/9783110908039/downloadAsset/9783110908039_Inhaltsverzeichnis.pdf)
Supplement: Supplementary file 1 [file 9783110908039_Inhaltsverzeichnis.pdf]

# A GRUNDZÜGE DER PHOTOGRAMMETRIE

|                                                                            |    |
|----------------------------------------------------------------------------|----|
| <b>1. EINLEITUNG</b>                                                       | 1  |
| 1.1 Definitionen                                                           | 1  |
| 1.2 Anwendungsmöglichkeiten                                                | 2  |
| 1.3 Einige Bemerkungen zur Entwicklungsgeschichte                          | 3  |
| <b>2. VORBEMERKUNGEN AUS MATHEMATIK UND DIGITALER BILDVERARBEITUNG</b>     | 5  |
| <b>2.1 Mathematische Vorbemerkungen</b>                                    | 5  |
| 2.1.1 Drehung sowie Affin- und Ähnlichkeitstransformation in der Ebene     | 5  |
| 2.1.2 Drehung sowie Affin- und Ähnlichkeitstransformation im Raum          | 10 |
| 2.1.3 Zentralprojektion des Raumes                                         | 16 |
| 2.1.4 Zentralprojektion und Projektivtransformation der Ebene              | 20 |
| 2.1.5 Zentralprojektion und Projektivtransformation der Geraden            | 26 |
| 2.1.6 Der Normalfall der Zweibildauswertung                                | 28 |
| 2.1.7 Fehlertheorie des Normalfalles                                       | 30 |
| <b>2.2 Vorbemerkungen aus digitaler Bildverarbeitung</b>                   | 33 |
| 2.2.1 Digitales Bild                                                       | 33 |
| 2.2.2 Digitales Messbild                                                   | 36 |
| 2.2.3 Digitale Normalfallbildauswertung und digitale projektive Entzerrung | 38 |
| <b>3. PHOTOGRAMMETRISCHE AUFNAHMESYSTEME UND IHR PRAKTISCHER EINSATZ</b>   | 46 |
| <b>3.1 Grundsätzliches zur Messkamera</b>                                  | 46 |
| 3.1.1 Die innere Orientierung einer Messkamera                             | 46 |
| 3.1.2 Kalibrierung von Messkameras                                         | 55 |
| 3.1.3 Korrektur der Objektiverzeichnung                                    | 56 |
| 3.1.4 Tiefenschärfe und Schärfentiefe                                      | 58 |
| 3.1.5 Auflösungsvermögen und Kontrastübertragung                           | 64 |
| 3.1.6 Lichtabfall von der Bildmitte zum Bildrand                           | 73 |
| <b>3.2 Photochemische Bildaufzeichnung</b>                                 | 74 |
| 3.2.1 Analoges Messbild                                                    | 74 |
| 3.2.1.1 Glas versus Film als Schichtträger                                 | 74 |
| 3.2.1.2 Korrektur der Filmdeformationen                                    | 76 |

|              |                                                                         |     |
|--------------|-------------------------------------------------------------------------|-----|
| <b>3.2.2</b> | <b>Belange der photochemischen Bildaufzeichnung</b>                     | 80  |
| 3.2.2.1      | Farben und Filter                                                       | 80  |
| 3.2.2.2      | Der photochemische Prozess der Schwarzweiß-Photographie                 | 84  |
| 3.2.2.3      | Gradation                                                               | 85  |
| 3.2.2.4      | Allgemeinempfindlichkeit                                                | 87  |
| 3.2.2.5      | Der photochemische Prozess der Farbphotographie                         | 89  |
| 3.2.2.6      | Spektrale Empfindlichkeit                                               | 92  |
| <b>3.2.3</b> | <b>Aufzeichnungsqualität photographischer Emulsionen</b>                | 95  |
| <b>3.2.4</b> | <b>Kopierung mit Kontraststeuerung</b>                                  | 97  |
| <b>3.2.5</b> | <b>Filme für die Luftbildaufnahme</b>                                   | 98  |
| <b>3.3</b>   | <b>Photoelektronische Bildaufzeichnung</b>                              | 100 |
| 3.3.1        | Prinzip der opto-elektronischen Sensoren                                | 100 |
| 3.3.2        | Auflösungsvermögen und Kontrastübertragung                              | 104 |
| 3.3.3        | Abstände der Detektoren (Abtasttheorie)                                 | 108 |
| 3.3.4        | Geometrische Aspekte von CCD-Kameras                                    | 110 |
| 3.3.5        | Radiometrische Aspekte von CCD-Kameras                                  | 111 |
| <b>3.4</b>   | <b>Digitalisierung analoger photographischer Bilder</b>                 | 115 |
| 3.4.1        | Digitalisierungsintervalle                                              | 115 |
| 3.4.2        | Grau- bzw. Farbwerte                                                    | 116 |
| 3.4.3        | Technische Lösungen                                                     | 119 |
| <b>3.5</b>   | <b>Verbesserung digitaler Bilder</b>                                    | 120 |
| <b>3.5.1</b> | <b>Kontrast- und Helligkeitsveränderungen</b>                           | 120 |
| 3.5.1.1      | Histogrammeinebnung                                                     | 124 |
| 3.5.1.2      | Histogrammnormalisierung                                                | 125 |
| 3.5.1.3      | Korrektur des Lichtabfalls von der Bildmitte zum Bildrand               | 129 |
| 3.5.1.4      | Histogrammnormalisierung und zusätzlich eine lokale Kontrastverstärkung | 130 |
| <b>3.5.2</b> | <b>Filterungen</b>                                                      | 133 |
| 3.5.2.1      | Filterungen im Ortsbereich                                              | 134 |
| 3.5.2.2      | Filterungen im Frequenzbereich                                          | 138 |
| <b>3.6</b>   | <b>Bildpyramiden/Datenkompression</b>                                   | 141 |
| 3.6.1        | Bildpyramiden                                                           | 141 |
| 3.6.2        | Bildkomprimierung                                                       | 142 |
| <b>3.7</b>   | <b>Luftbildkameras und ihr praktischer Einsatz</b>                      | 144 |
| <b>3.7.1</b> | <b>Flugplanung</b>                                                      | 144 |
| <b>3.7.2</b> | <b>Luftbildmesskameras</b>                                              | 150 |
| 3.7.2.1      | Großformatige Filmmesskameras                                           | 151 |
| 3.7.2.2      | Digitale Kameras mit CCD-Flächensensoren                                | 158 |
| 3.7.2.3      | Digitale Dreizeilenkameras                                              | 160 |

|              |                                                                                       |     |
|--------------|---------------------------------------------------------------------------------------|-----|
| <b>3.7.3</b> | <b>Satellitenpositionierungs- und Inertialsysteme</b>                                 | 162 |
| 3.7.3.1      | GPS-Einsatz beim Bildflug und Belichtung der Aufnahmen                                | 162 |
| 3.7.3.2      | Genaue Bestimmung der äußeren Orientierungselemente mit GPS und IMU                   | 163 |
| 3.7.3.3      | Kreiselstabilisierte Plattform und Besonderheiten bei Zeilenkameras und Laserscannern | 170 |
| <b>3.7.4</b> | <b>Bewegungsunschärfe und ihre Kompensation</b>                                       | 172 |
| <b>3.7.5</b> | <b>Die wirksame Beleuchtung für Luftaufnahmen</b>                                     | 176 |
| <b>3.7.6</b> | <b>Vermessungsflugzeuge</b>                                                           | 179 |
| <b>3.8</b>   | <b>Erdbildkameras und ihr praktischer Einsatz</b>                                     | 180 |
| 3.8.1        | Normalfall der terrestrischen Photogrammetrie                                         | 181 |
| 3.8.2        | Stereomesskameras                                                                     | 183 |
| 3.8.3        | Einzelmesskameras                                                                     | 185 |
| 3.8.4        | Teilmesskameras/Réseaukameras                                                         | 187 |
| 3.8.5        | Amateurlkameras/Nicht-Messkameras                                                     | 189 |
| 3.8.6        | Zwischenbemerkung                                                                     | 189 |
| 3.8.7        | CCD-Kameras                                                                           | 191 |
| 3.8.8        | Planung terrestrischer Aufnahmen                                                      | 194 |
| <b>4.</b>    | <b>ORIENTIERUNGSVERFAHREN UND EINIGE METHODEN DER ZWEIBILDAUSWERTUNG</b>              | 201 |
| <b>4.1</b>   | <b>Mit bekannter äußerer Orientierung</b>                                             | 202 |
| 4.1.1        | Zwei überlappende Messbilder                                                          | 202 |
| 4.1.2        | Messaufnahmen mit einer Dreizeilenkamera                                              | 205 |
| <b>4.2</b>   | <b>Mit unbekannter äußerer Orientierung</b>                                           | 206 |
| 4.2.1        | Getrennte Orientierung der beiden Messbilder                                          | 207 |
| 4.2.2        | Gemeinsame Orientierung der beiden Messbilder (einstufig)                             | 210 |
| 4.2.3        | Gemeinsame Orientierung der beiden Messbilder (zweistufig)                            | 212 |
| <b>4.3</b>   | <b>Relative Orientierung</b>                                                          | 215 |
| 4.3.1        | Relative Orientierung genäherter Senkrechtaufnahmen                                   | 215 |
| 4.3.2        | Relative Orientierung stark geneigter Messbilder und Modellbildung                    | 221 |
| 4.3.3        | Alternativer Ansatz zur relativen Orientierung                                        | 225 |
| 4.3.4        | Relative Orientierung genäherter Senkrechtaufnahmen mit y-Parallaxen                  | 229 |
| 4.3.5        | Gefährliche Konstellationen der relativen Orientierung                                | 235 |
| 4.3.6        | Fehlertheorie der relativen Orientierung                                              | 239 |
| 4.3.6.1      | Mittlere Fehler der Orientierungselemente                                             | 239 |
| 4.3.6.2      | Deformationen der Stereomodelle                                                       | 241 |

|            |                                                                                             |     |
|------------|---------------------------------------------------------------------------------------------|-----|
| <b>4.4</b> | <b>Absolute Orientierung</b>                                                                | 245 |
| 4.4.1      | Kleinste-Quadrate-Ausgleichung                                                              | 245 |
| 4.4.2      | Fehlertheorie der absoluten Orientierung                                                    | 251 |
| 4.4.3      | Ermittlung von Näherungswerten                                                              | 255 |
| <b>4.5</b> | <b>Bildkoordinatenbereinigung</b>                                                           | 256 |
| 4.5.1      | Refraktionskorrektur für genäherte Senkrechtaufnahmen                                       | 257 |
| 4.5.2      | Refraktions- und Erdkrümmungskorrektur<br>für horizontale Aufnahmen                         | 259 |
| 4.5.3      | Erdkrümmungskorrektur für genäherte Senkrechtaufnahmen                                      | 262 |
| 4.5.4      | Virtuelles (digitales) Korrekturbild                                                        | 265 |
| <b>4.6</b> | <b>Genauigkeit der punktweisen Zweibildauswertung</b>                                       | 266 |
| <b>5.</b>  | <b>PHOTOGRAMMETRISCHE TRIANGULATION</b>                                                     | 273 |
| <b>5.1</b> | <b>Vorbemerkungen zur Aerotriangulation</b>                                                 | 273 |
| <b>5.2</b> | <b>Blockausgleichung mit unabhängigen Modellen</b>                                          | 275 |
| 5.2.1      | Lageblockausgleichung                                                                       | 275 |
| 5.2.2      | Räumliche Blockausgleichung                                                                 | 285 |
| 5.2.3      | Lage- und Höhengengenauigkeit der Blockausgleichung mit<br>unabhängigen Modellen            | 287 |
| 5.2.3.1    | Lageengenauigkeit                                                                           | 288 |
| 5.2.3.2    | Höhengengenauigkeit                                                                         | 294 |
| 5.2.3.3    | Empirische Lage- und Höhengengenauigkeit                                                    | 297 |
| 5.2.3.4    | Lage- und Höhengengenauigkeit der Streifentriangulation                                     | 297 |
| <b>5.3</b> | <b>Bündelblockausgleichung</b>                                                              | 299 |
| 5.3.1      | Grundprinzip                                                                                | 299 |
| 5.3.2      | Verbesserungs- und Normalgleichungen eines Bildverbandes                                    | 300 |
| 5.3.3      | Auflösung der Normalgleichungen                                                             | 302 |
| 5.3.4      | Unbekannte innere Orientierung und zusätzliche Parameter                                    | 304 |
| 5.3.5      | Genauigkeit sowie Vor- und Nachteile der<br>Bündelblockausgleichung                         | 305 |
| <b>5.4</b> | <b>GPS- und IMU-gestützte Aerotriangulation</b>                                             | 306 |
| <b>5.5</b> | <b>Georeferenzierung von Aufnahmen einer Dreizeilenkamera</b>                               | 308 |
| <b>5.6</b> | <b>Berücksichtigung der Gestalt der Erde und der<br/>Verzerrungen der Landeskoordinaten</b> | 312 |
| <b>5.7</b> | <b>Photogrammetrische Triangulation im Nahbereich</b>                                       | 314 |

|              |                                                                                                   |     |
|--------------|---------------------------------------------------------------------------------------------------|-----|
| <b>6.</b>    | <b>AUSWERTEGERÄTE UND WEITERE<br/>ZWEIBILDAUSWERTEVERFAHREN</b>                                   | 319 |
| <b>6.1</b>   | <b>Stereo-Betrachtungssysteme</b>                                                                 | 319 |
| 6.1.1        | Natürliches räumliches Sehen                                                                      | 319 |
| 6.1.2        | Betrachtung von analogen und digitalen Stereobildern                                              | 321 |
| <b>6.2</b>   | <b>Stereoskopisches Mess- bzw. Zuordnungsprinzip</b>                                              | 329 |
| <b>6.3</b>   | <b>Analoge Zweibildauswertegeräte</b>                                                             | 331 |
| <b>6.4</b>   | <b>Analytische Zweibildauswertegeräte</b>                                                         | 334 |
| 6.4.1        | Stereokomparator                                                                                  | 335 |
| 6.4.2        | Elektronische Registrierung der Bildkoordinaten<br>(Monokomparator)                               | 336 |
| 6.4.3        | Universelles analytisches Zweibildauswertegerät                                                   | 339 |
| <b>6.5</b>   | <b>Digitale Zweibildauswertegeräte</b>                                                            | 341 |
| <b>6.6</b>   | <b>Manuelle (computergestützte) Auswertemethoden</b>                                              | 343 |
| 6.6.1        | Situationsauswertung                                                                              | 343 |
| 6.6.2        | Höhenauswertung                                                                                   | 346 |
| 6.6.3        | Gebäudeauswertung                                                                                 | 348 |
| 6.6.4        | Übergang auf raumbezogene Informationssysteme                                                     | 353 |
| <b>6.7</b>   | <b>Genauigkeit manuell (computergestützt) erhaltener<br/>Auswerteergebnisse</b>                   | 354 |
| 6.7.1        | Situationsauswertung                                                                              | 355 |
| 6.7.2        | Höhenauswertung                                                                                   | 357 |
| 6.7.3        | Kontrolle der Auswertung                                                                          | 360 |
| <b>6.8</b>   | <b>Automatische und halbautomatische Auswerteverfahren</b>                                        | 361 |
| <b>6.8.1</b> | <b>Korrelationsalgorithmen</b>                                                                    | 361 |
| 6.8.1.1      | Korrelationskoeffizient als Ähnlichkeitsmaß                                                       | 363 |
| 6.8.1.2      | Korrelation im Subpixelbereich                                                                    | 364 |
| 6.8.1.3      | Interest-Operatoren                                                                               | 369 |
| 6.8.1.4      | Merkmalsbasierte Korrelation                                                                      | 370 |
| 6.8.1.5      | Gleichzeitige Korrelation in mehr als zwei Bildern                                                | 371 |
| <b>6.8.2</b> | <b>Automatische innere Orientierung</b>                                                           | 373 |
| <b>6.8.3</b> | <b>Automatische relative Orientierung und automatische<br/>Bestimmung von Verknüpfungspunkten</b> | 375 |
| <b>6.8.4</b> | <b>Automatische Lokalisierung von Passpunkten</b>                                                 | 380 |
| <b>6.8.5</b> | <b>Einbeziehung der Kernstrahlgeometrie in die Korrelation</b>                                    | 381 |
| <b>6.8.6</b> | <b>Automatische Erfassung von Oberflächen</b>                                                     | 392 |

|           |                                                                                                           |     |
|-----------|-----------------------------------------------------------------------------------------------------------|-----|
| 6.8.7     | <b>Halbautomatische Situationsauswertung</b>                                                              | 394 |
| 6.8.7.1   | Mit aktiven Konturlinien ( <i>snakes</i> )                                                                | 395 |
| 6.8.7.2   | Mit sequentiellen Arbeitsabläufen                                                                         | 397 |
| 6.8.8     | <b>Halbautomatische Gebäudeauswertung</b>                                                                 | 403 |
| 6.8.9     | <b>Genauigkeit und Zuverlässigkeit automatisch<br/>bzw. halbautomatisch erhaltener Auswerteergebnisse</b> | 407 |
| 6.8.10    | <b>Besonderheiten der Dreizeilenkamera</b>                                                                | 408 |
| <b>7.</b> | <b>ORTHOPHOTOS UND EINZELBILDAUSWERTUNG</b>                                                               | 410 |
| 7.1       | <b>Verzerrungen eines Messbildes</b>                                                                      | 411 |
| 7.2       | <b>Orthophotos ebener Objekte und ihre Genauigkeit</b>                                                    | 418 |
| 7.2.1     | Mit orthogonaler Aufnahmerichtung                                                                         | 418 |
| 7.2.2     | Mit geneigter Aufnahmerichtung                                                                            | 421 |
| 7.2.3     | Gemeinsame projektive und affine Entzerrung                                                               | 424 |
| 7.3       | <b>Orthophotos gekrümmter Objekte und ihre Genauigkeit</b>                                                | 425 |
| 7.3.1     | Herstellungsprinzip                                                                                       | 425 |
| 7.3.2     | Orthophotogenauigkeit                                                                                     | 431 |
| 7.4       | <b>Analoge, analytische und digitale Einzelbildauswertung</b>                                             | 440 |
| 7.4.1     | Analoge, analytische und digitale Orthophotoauswertung                                                    | 440 |
| 7.4.2     | Analytische und digitale Auswertung einer geneigten<br>Aufnahme eines ebenen Objektes                     | 441 |
| 7.4.3     | Analytische und digitale Einzelbildauswertung gekrümmter Objekt-<br>flächen                               | 442 |
| 7.5       | <b>Photomodelle</b>                                                                                       | 445 |
| 7.6       | <b>Statische und dynamische Visualisierungen</b>                                                          | 448 |
| <b>8.</b> | <b>LASERSCANNING</b>                                                                                      | 449 |
| 8.1       | <b>Flugzeuggetragenes Laserscanning</b>                                                                   | 449 |
| 8.1.1     | <b>Aufnahmeprinzip</b>                                                                                    | 449 |
| 8.1.2     | <b>Auswertung</b>                                                                                         | 454 |
| 8.1.2.1   | Georeferenzierung                                                                                         | 454 |
| 8.1.2.2   | Ableitung von Geländemodellen                                                                             | 458 |
| 8.1.2.3   | Ableitung von Gebäudemodellen                                                                             | 463 |
| 8.1.3     | <b>Gegenüberstellung von zwei Paradigmen und weitere<br/>Leistungsparameter zum Laserscanning</b>         | 465 |

|                      |                                                                                                       |     |
|----------------------|-------------------------------------------------------------------------------------------------------|-----|
| <b>8.2</b>           | <b>Terrestrisches Laserscanning</b>                                                                   | 471 |
| 8.2.1                | Aufnahmeprinzip                                                                                       | 471 |
| 8.2.2                | Georeferenzierung                                                                                     | 473 |
| 8.2.3                | Verknüpfung von Punktwolken                                                                           | 476 |
| 8.2.4                | Strategien zur Objektmodellierung                                                                     | 477 |
| 8.2.5                | Zusammenführung von Laserdaten und von<br>photographischen Daten                                      | 481 |
| <b>8.3</b>           | <b>Laserscanning im extremen Nahbereich</b>                                                           | 483 |
| <b>Anhang 2.1-1:</b> | <b>Räumliche Drehmatrix</b>                                                                           | 487 |
| <b>Anhang 2.1-2:</b> | <b>Mathematischer Zusammenhang zwischen Bild-<br/>und Objektkoordinaten (Kollinearitätsbeziehung)</b> | 492 |
| <b>Anhang 2.1-3:</b> | <b>Differentiale der Kollinearitätsbeziehung</b>                                                      | 494 |
| <b>Anhang 2.2-1:</b> | <b>Ableitung der Formel (2.2-5) mit homogenen Koordinaten</b>                                         | 496 |
| <b>Anhang 4.1-1:</b> | <b>Ausgleichung nach der Methode der kleinsten Quadrate</b>                                           | 497 |
| <b>Anhang 4.2-1:</b> | <b>Direkte lineare Transformation (DLT) mit<br/>homogenen Koordinaten</b>                             | 501 |
| <b>Anhang 4.3-1:</b> | <b>Differentiale der Koplanaritätsbedingung</b>                                                       | 501 |
| <b>Anhang 4.6-1:</b> | <b>Die empirische Bestimmung von Standardabweichungen<br/>und Toleranzen</b>                          | 503 |
|                      | <b>Vervollständigung der Literaturhinweise</b>                                                        | 505 |
|                      | <b>SACHREGISTER</b>                                                                                   | 506 |
